# Supplementary material
Source: PubMed Central journal article supplement (PMC6065041)
Supplement: pnas.1802261115.sapp.pdf [file pnas.1802261115.sapp.pdf]

## **Supplementary Information for**

Recognition of Conserved Antigens by Th17 Cells Provides Broad  
Protection against Pulmonary *Haemophilus Influenzae* Infection

Wenchao Li, Xinyun Zhang, Ying Yang, Qingqin Yin, Yan Wang, Yong Li, Chuan  
Wang, Sandy Wong, Ying Wang, Howard Goldfine, Brian J. Akerley and Hao Shen

Corresponding Author: Dr. Hao Shen; Dr. Brian J. Akerley  
Email: [hshen@pennmedicine.upenn.edu](mailto:hshen@pennmedicine.upenn.edu); [bakerley@umc.edu](mailto:bakerley@umc.edu).

### **This PDF file includes:**

Figs. S1 to S6  
Tables S1 to S2  
References for SI reference citations

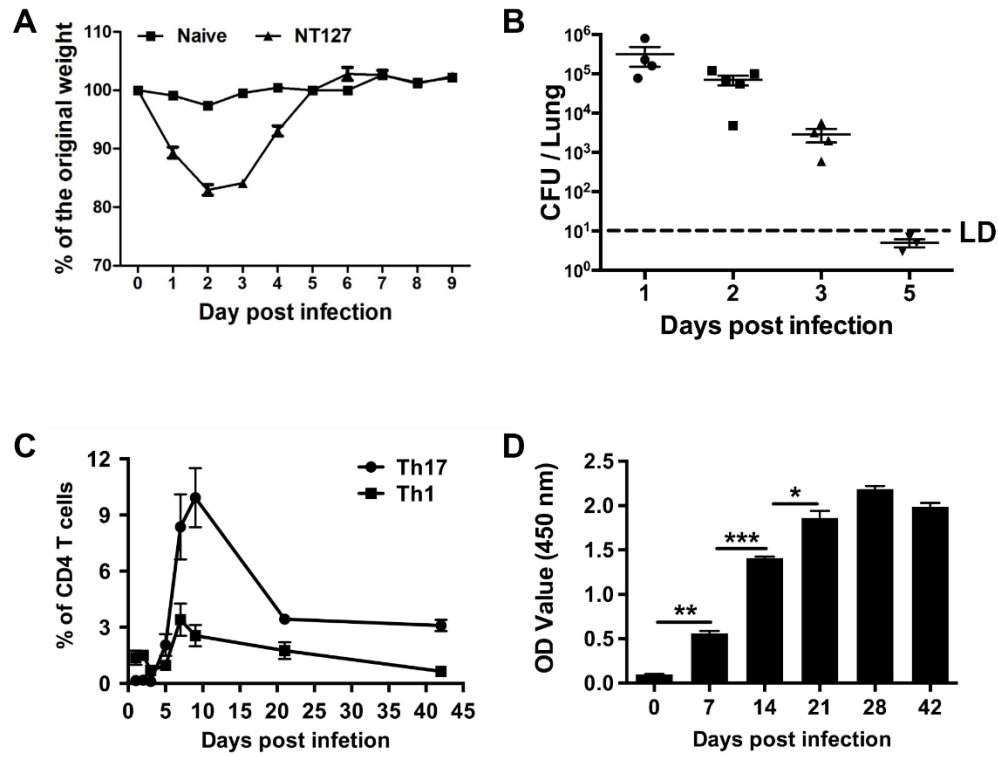

**Fig. S1. Kinetics of immune response to NT127 infection.** B6 mice were infected with NT127. Body weight change (A) and bacteria load in the lung (B) were measured. Kinetics of NT127-specific CD4 T cells producing IFN- $\gamma$  (Th1) and IL-17 (Th17) (C), and antibody responses (D) were determined.  $n = 3-4$ , error bars = means  $\pm$  SEM. \*\*\*  $P < 0.001$ ; \*\*  $P < 0.01$ ; \*  $P < 0.05$ . LD, limit of detection.

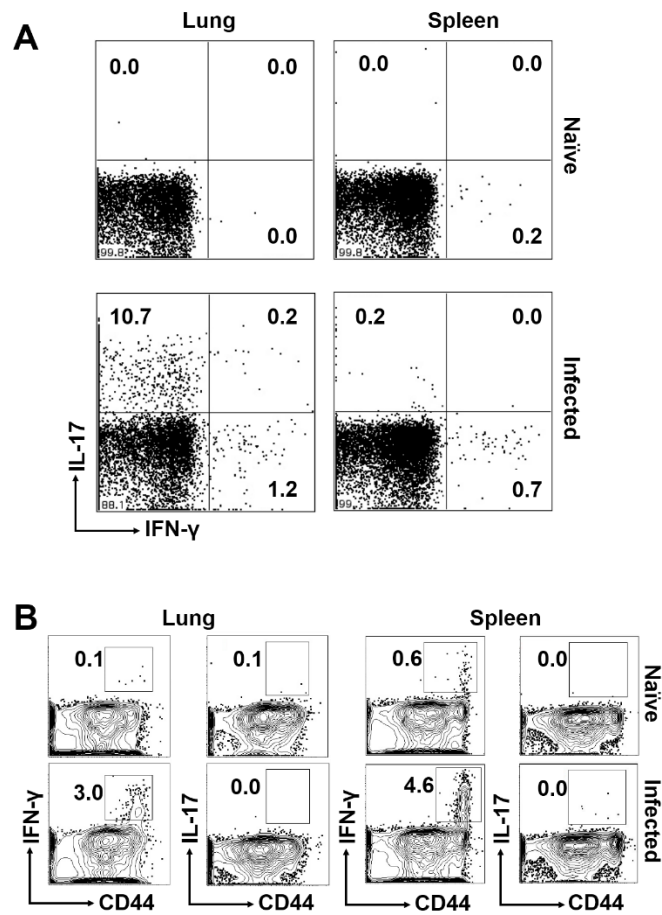

**Fig. S2. Production of cytokines by T cells after NT127 infection.** Lymphocytes from the lung and spleen of NT127-infected mice (day7) were stimulated with heat-killed NT127, followed by ICS for IFN- $\gamma$ /IL-17 co-expression by CD4 T cells (A), and production of IFN- $\gamma$  and IL-17 by CD8 T cells (B).

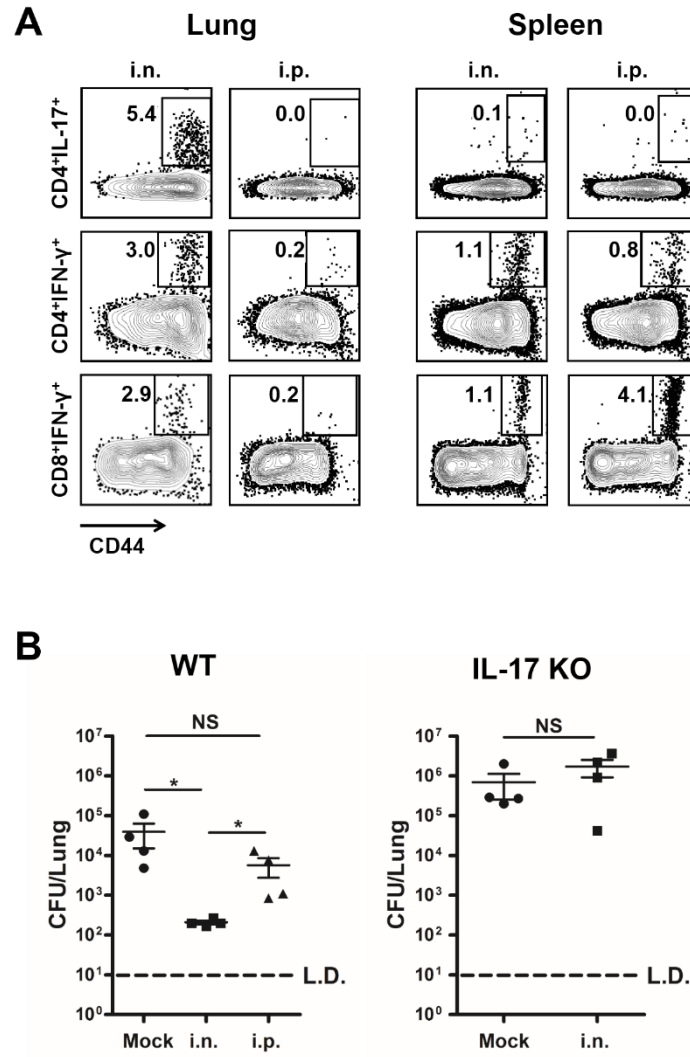

**Fig. S3. IL-17 is important for heterologous protection.** (A) B6 mice were immunized with NT127 via intranasal (i.n.) or intraperitoneal (i.p.) route. On D7 after infection, NT127 specific CD4 and CD8 T cell response in the lung and spleen were examined by ICS of IFN- $\gamma$  and IL-17 following stimulation with heat-killed NT127. (B) B6 WT and IL-17 KO mice were immunized i.n. or i.p. with heat-killed NT127. Three weeks after immunization, immune mice and naïve controls were challenged intranasally with the heterologous strain 86-028NP. Two days after challenge, bacterial loads in the lung were determined. n=4, error bars = means  $\pm$  SEM. \* $P$  < 0.05; NS, not significant. L.D., limit of detection.

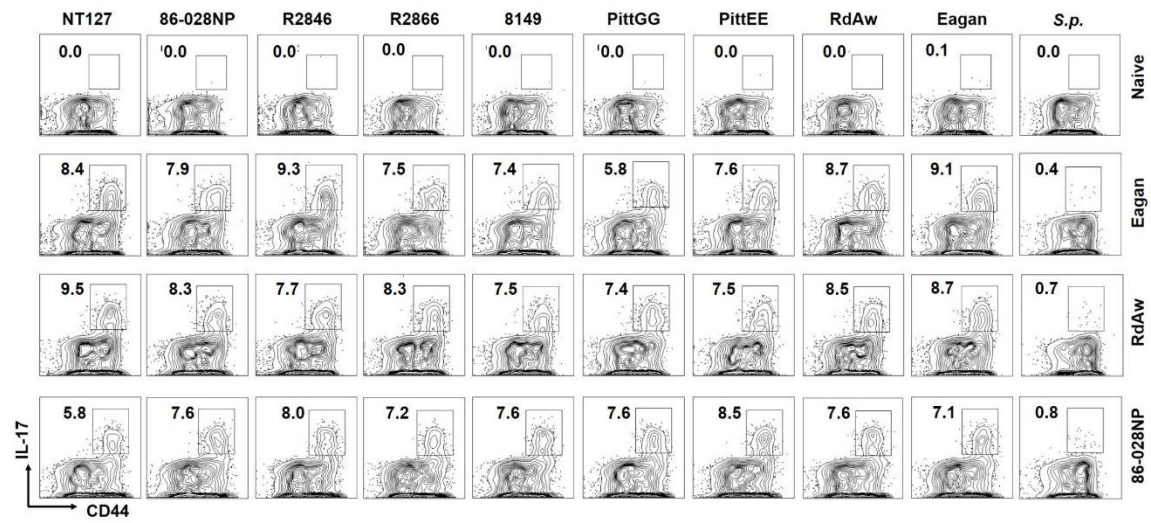

**Fig. S4. Broad cross-reactivity of Th17 cells.** Lung lymphocytes from naïve mice and mice infected with Eagan, RdAw or 86-28NP were stimulated with heat-killed bacteria of 9 different *H. influenzae* strains, and *S. pneumoniae* (*S.p.*). Activation of reactive Th17 cells was measured by ICS of IL-17 expression.

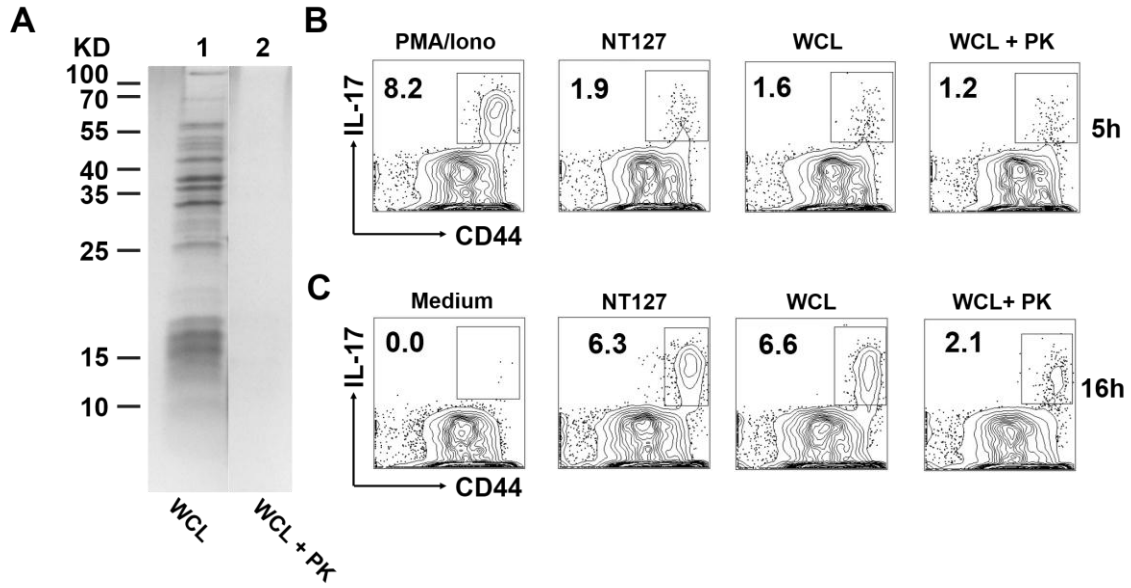

**Fig. S5. Th17 response to NTHi is directed primarily to protein antigens.** (A) Whole cell lysate of NT127 was treated with protease K (WCL+PK) or buffer alone (WCL) and analyzed by SDS-PAGE. (B) Lung cells from NT127 infected mice were pooled and stimulated with heat-killed NT127 or NT127 cell lysate treated or untreated with protease K for 5 h. PMA/ionomycin stimulation (PMA/Iono) was used as positive control. (C) Lung cells were also cultured with the indicated bacterial preparations for 16 h. Production of IL-17 by CD4 T cells was analyzed by ICS and representative data were shown.

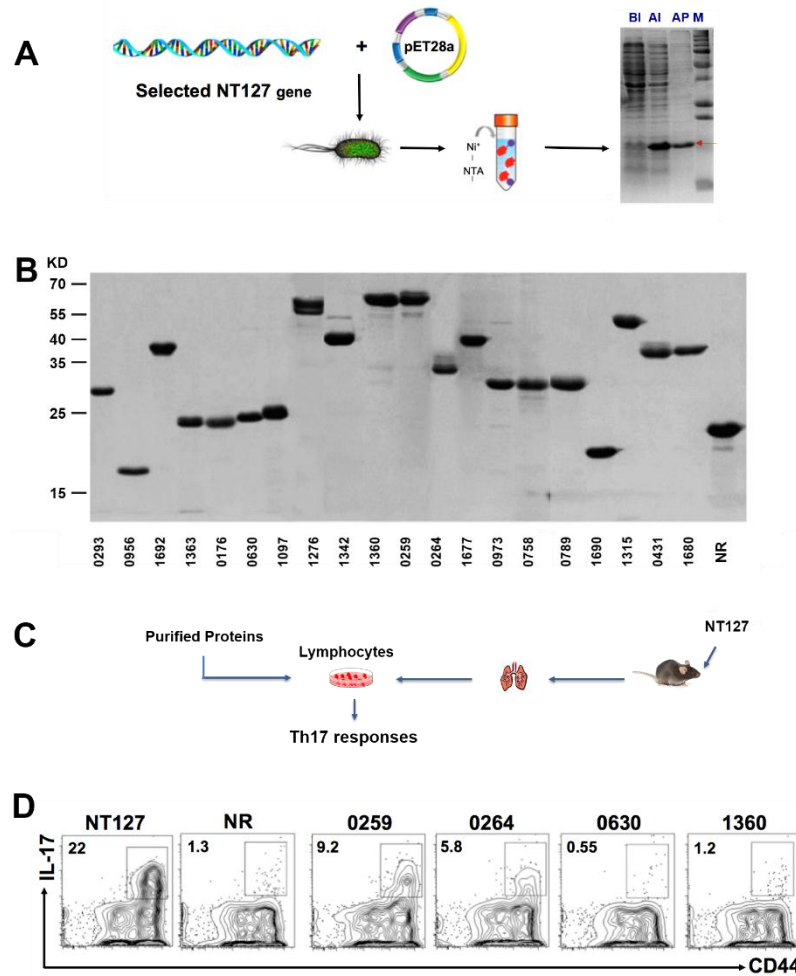

**Fig. S6. Strategy for identification of Th17 antigens.** (A) Genes encoding selected NTHi proteins were cloned into pET28a plasmid. Recombinant proteins were expressed in *E. coli* BL21 to high levels by IPTG induction and purified by Ni affinity column. The SDS gel image showed purification of a representative protein (BI, before induction; AI, after induction; AP, after purification; M, marker). (B) SDS gel images showing purity of 20 proteins purified with Ni column as described in the material and methods. (C) Purified individual proteins were used to stimulate lung lymphocytes from NT127-infected mice, and IL-17 producing CD4 T cells were detected by ICS. (D) FACS plots of representative proteins that were identified as positive (0258 & 0264) and negative (0630 & 1360). Heat-killed NT127 and a non-relevant protein (NR, the negative control) were included as a positive and negative control, respectively.

**Table S1. PCR Primers**

| <b>No.</b> | <b>Gene No.</b> | <b>Pimer</b> | <b>Primer sequence ( 5'-3' )</b>              |
|------------|-----------------|--------------|-----------------------------------------------|
| 1          | HIAG00259       | Forward      | GGG <b>CCA TGG</b> TGC AAC ACA AAC TAC TCT    |
|            |                 | Reverse      | GGG <b>CTC GAG</b> ATG TTT AAT AAT ATA AAG    |
| 2          | HIAG00264       | Forward      | GGG <b>CCA TGG</b> TGA CAA CAA AAA CAA CT     |
|            |                 | Reverse      | CGG <b>CTC GAG</b> CAA TCC TAA CTT TTC TTC    |
| 3          | HIAG01276-1     | Forward      | GGC <b>CCA TGG</b> TGC GAT TTT CTA AAC T      |
|            |                 | Reverse      | GGC <b>CTC GAG</b> CAC CCC ATA AAC AAA G      |
| 4          | HIAG01276-2     | Forward      | GCG <b>CCA TGG</b> ATG GGG TGG ATT ATA T      |
|            |                 | Reverse      | GCG <b>CTC GAG</b> GAA GCT ATA AAC TGC ACT    |
| 5          | HIAG00176       | Forward      | GGG <b>CCA TGG</b> TGA AAA ACA TCG CAA AAG T  |
|            |                 | Reverse      | GGG <b>CTC GAG</b> TTT TTT CTC TTG TGC T      |
| 6          | HIAG00630       | Forward      | GGG <b>CCA TGG</b> TGA AAA AAA CAA CCT T      |
|            |                 | Reverse      | GGG <b>CTC GAG</b> TTT TTT ACG TTG ATC AT     |
| 7          | HIAG01097       | Forward      | GGG <b>CCA TGG</b> TGC TCG CAA AAT TGT T      |
|            |                 | Reverse      | GGG <b>CTC GAG</b> AGT TTT ACC TTC AGC        |
| 8          | HIAG01360       | Forward      | GGG <b>CTC GAG</b> AGT TTT ACC TTC AGC        |
|            |                 | Reverse      | GGG <b>GCG GCC</b> GCC TTC GCA ATA CGT TTA T  |
| 9          | HIAG01677       | Forward      | GCG <b>CCA TGG</b> TGA AAA AAC TTT TAA AAA T  |
|            |                 | Reverse      | GCG <b>CTC GAG</b> TTT AGC TAA ACA TTC TAT G  |
|            |                 | Reverse      | GGC <b>CTC GAG</b> AAC ATT TTC TAC CGC CT     |
| 10         | HIAG00758       | Forward      | CGC <b>CCA TGG</b> TGA ATA TCA CAG CCA T      |
|            |                 | Reverse      | GGC <b>CTC GAG</b> TTT ATC CTT ATT TTG AC     |
| 11         | HIAG00293       | Forward      | CGC <b>CCA TGG</b> TGA TCG TCA ATT TTA T      |
|            |                 | Reverse      | GCC <b>CTC GAG</b> ACC TGC GCC AAA CAT AAT    |
| 12         | HIAG01342       | Forward      | CCG <b>GCT AGC</b> ATG GCA ACC TAC TTT TCT    |
|            |                 | Reverse      | GCG <b>CTC GAG</b> TTA TTT CAC TTC TTT AAA T  |
| 13         | HIAG00431       | Forward      | CCG <b>CCA TGG</b> GCC AAA ATG CTA AAC GT     |
|            |                 | Reverse      | CGC <b>CTC GAG</b> TTT TAA GTT TGC AAA AGC CT |

| <b>No.</b> | <b>Gene No.</b> | <b>Pimer</b> | <b>Primer sequence ( 5'-3' )</b>              |
|------------|-----------------|--------------|-----------------------------------------------|
| 14         | HIAG00789       | Forward      | CCC <b>CCA TGG</b> TGC GTT GTT TAG CAC T      |
|            |                 | Reverse      | CCG <b>CTC GAG</b> GCC ATA AAT TGT TCC T      |
| 15         | HIAG01315       | Forward      | CGC <b>CCA TGG</b> TGT CAT TAC GCA TTA AAC    |
|            |                 | Reverse      | CCG <b>CTC GAG</b> GCC CAT ACG ATA GTT CGG T  |
| 16         | HIAG01680       | Forward      | CCG <b>CCA TGG</b> TGC AAC AAC ACA ATC TCT    |
|            |                 | Reverse      | CCG <b>CTC GAG</b> AAT TCG CTC AAA ACC AGC T  |
| 17         | HIAG01690       | Forward      | CCG <b>CCA TGG</b> TGC AAA AAC AGA TTG AAA T  |
|            |                 | Reverse      | CCC <b>CTC GAG</b> TTC TTC AAA ATA CCC CAT AT |
| 18         | HIAG00294       | Forward      | GCG <b>CCA TGG</b> TGA ATC AAA ATC TAA TTG    |
|            |                 | Reverse      | CGC <b>CTC GAG</b> TTC AAA CAA TTC CTT CAT    |
| 19         | HIAG00956       | Forward      | GCG <b>CCA TGG</b> TGA AAC TTA CAT CGA AAG    |
|            |                 | Reverse      | GAG <b>CTC GAG</b> TTG ATT AAC TAA TAA AT     |
| 20         | HIAG01692       | Forward      | GCG <b>CCA TGG</b> TGA AAA AAA CAC TTG CAG    |
|            |                 | Reverse      | CGC <b>CTC GAG</b> GTA AAC GCG TAA ACC TAC    |
| 21         | HIAG01363       | Forward      | CGC <b>CCA TGG</b> AAA CGT ATT CAT TAT TAC    |
|            |                 | Reverse      | CGC <b>CTC GAG</b> CTC ACA TTG AAT TAT TAC    |

**Table S2. Th17 Cell Antigens Selected by Bioinformatic Filters.**

| <b>Protein</b>       | <b>NT127 Locus</b> | <b>Rd KW20 gene ID</b> | <b>Known or inferred function</b>                                        | <b>Size (aa)</b> | <b>Homology range for Hi strains<sup>f</sup></b> |
|----------------------|--------------------|------------------------|--------------------------------------------------------------------------|------------------|--------------------------------------------------|
| 0973 <sup>a, b</sup> | HIAG_00973         | HI0362                 | iron-chelated ABC transporter periplasmic-binding protein YfeA           | 293              | 96-99                                            |
| 1692 <sup>a</sup>    | HIAG_01692         | HI0139                 | OmpP2, outer membrane protein P2                                         | 371              | 81-100                                           |
| 0956 <sup>b</sup>    | HIAG_00956         | HI0379                 | iron-sulfur cluster assembly transcriptional regulator IscR              | 150              | 96-99                                            |
| 1363 <sup>b, c</sup> | HIAG_01363         | HI1249                 | ABC transporter periplasmic component, zinc utilization protein ZevA (1) | 206              | 94-97                                            |
| 1677 <sup>b</sup>    | HIAG_01677         | HI0119                 | Zinc ABC transporter, periplasmic-binding protein ZnuA                   | 347              | 88-99                                            |
| 0758 <sup>b</sup>    | HIAG_00758         | HI0408                 | Zinc ABC transporter, ATP-binding protein ZnuC                           | 268              | 95-98                                            |
| 0789 <sup>b</sup>    | HIAG_00789         | HI0144                 | NanK, N-acetylmannosamine kinase                                         | 300              | 97-99                                            |
| 1690 <sup>b</sup>    | HIAG_01690         | HI0138                 | RnhA, ribonuclease HI                                                    | 174              | 94-98                                            |
| 1680 <sup>b</sup>    | HIAG_01680         | HI0122                 | MetC, cystathionine beta-lyase                                           | 395              | 92-99                                            |
| 0431 <sup>b</sup>    | HIAG_00431         | HI0086                 | MetB, O-succinylhomoserine (thiol)-lyase                                 | 393              | 95-98                                            |
| 1315 <sup>b</sup>    | HIAG_01315         | HI0221                 | GuaB, inosine-5'-monophosphate dehydrogenase                             | 488              | 91-99                                            |
| 1342 <sup>b</sup>    | HIAG_01342         | HI1277                 | Mrp, ATP-binding protein, chromosome partitioning                        | 386              | 94-96                                            |
| 0293 <sup>b, d</sup> | HIAG_00293         | HI1087                 | YrbF, ABC transporter permease, membrane stability                       | 261              | 95-99                                            |
| 0176 <sup>d, e</sup> | HIAG_00176         | HI0916                 | outer membrane protein H family member Omp26                             | 197              | 93-99                                            |
| 0630 <sup>d</sup>    | HIAG_00630         | HI1591                 | outer membrane lipoprotein carrier protein LolA                          | 205              | 95-99                                            |
| 1097 <sup>c</sup>    | HIAG_01097         | HI1300                 | ABC transporter ATP-binding protein uup                                  | 213              | 92-98                                            |
| 1360 <sup>c</sup>    | HIAG_01360         | HI1252                 | ABC transporter ATP-binding protein                                      | 556              | 93-87                                            |
| 0259 <sup>a, c</sup> | HIAG_00259         | HI1124                 | oligopeptide permease ABC transporter membrane protein OppA              | 541              | 98-99                                            |
| 0264 <sup>c</sup>    | HIAG_00264         | HI1119                 | membrane protein LapB*                                                   | 292              | 97-100                                           |
| 1276 <sup>d</sup>    | HIAG_01276         | HI0262                 | Heme-hemopexin utilization protein, HxC                                  | 712              | 94-95                                            |

<sup>a</sup> homologous to NTHi 86-028NP proteins identified in OMVs (2)<sup>b</sup> required in NTHi/IAV coinfection (3)<sup>c</sup> membrane protein (4)<sup>d</sup> outer membrane protein (4, 5)<sup>e</sup> homologous to OMP26 identified in (NTHi) strain 289 (6)<sup>f</sup> the blast includes all the 15 completely sequenced Hi strains (Accession: CP002277.1, FQ670204.1, CP007471.1, CP000671.1, CP007472.1, CP000057.2, CP007470.1, CP007805.1, CP000672.1, L42023.1, CP005967.1, CP002276.1, FQ670178.1, CP008740.1, CP009610.1.)

\* E. coli protein named LapB has been functionally characterized has no amino acid sequence similarity to LapB of NTHi

## References

1. Rosadini CV, Gawronski JD, Raimunda D, Arguello JM, Akerley BJ (2011) A novel zinc binding system, ZevAB, is critical for survival of nontypeable *Haemophilus influenzae* in a murine lung infection model. *Infect Immun* 79(8):3366-76.
2. Sharpe SW, Kuehn MJ, Mason KM (2011) Elicitation of epithelial cell-derived immune effectors by outer membrane vesicles of nontypeable *Haemophilus influenzae*. *Infect Immun* 79(11):4361-9.
3. Wong SM, Bernui M, Shen H, Akerley BJ (2013) Genome-wide fitness profiling reveals adaptations required by *Haemophilus* in coinfection with influenza A virus in the murine lung. *Proc Natl Acad Sci U S A* 110(38):15413-8.
4. Wattam AR, Abraham D, Dalay O, Disz TL, Driscoll T, Gabbard JL, Gillespie JJ, Gough R, Hix D, Kenyon R, Machi D, Mao C, Nordberg EK, Olson R, Overbeek R, Pusch GD, Shukla M, Schulman J, Stevens RL, Sullivan DE, Vonstein V, Warren A, Will R, Wilson MJ, Yoo HS, Zhang C, Zhang Y, Sobral BW (2014) PATRIC, the bacterial bioinformatics database and analysis resource. *Nucleic Acids Res* 42(Database issue):D581-91.
5. Wong SM, Akerley BJ (2012) Genome-scale approaches to identify genes essential for *Haemophilus influenzae* pathogenesis. *Front Cell Infect Microbiol* 2:23.
6. Kyd JM, Cripps AW (1998) Potential of a novel protein, OMP26, from nontypeable *Haemophilus influenzae* to enhance pulmonary clearance in a rat model. *Infect Immun* 66(5):2272-8.
